# Supplementary material for: Fusion of genomic, proteomic and phenotypic data: the case of potyviruses
Source: Royal Society of Chemistry journal article supplement (doi:10.1039/c5mb00507h), 2015-11-04
Supplement: c5mb00507h1.xlsx [file c5mb00507h1.xlsx]

## Sheet: 1
Mutations performed on TEV, distances registered, and fitness measured.
	Mutant nº	Mutation 1	Mutation 2	Distance 1	Distance 2	Fitness	Relative Fitness
	wild-type	-	-	-	-	1.3461	1
	1	PC6	PC7	14	17	1.3889	1.0318
	2	PC6	PC19	14	0	1.3842	1.0283
	3	PC7	PC19	17	0	1.3802	1.02533
	4	PC12	PC19	19	0	1.374	1.02073
	5	PC6	PC49	14	14	1.3813	1.02615
	6	PC7	PC63	17	14	1.3843	1.02838
	7	PC6	PC63	14	14	1.3764	1.02251
	8	PC6	PC69	14	17	1.3904	1.03291
	9	PC7	PC69	17	17	1.3806	1.02563
	10	PC2	PC69	39	17	1.3445	0.998811
	11	PC12	PC83	19	14	1.3698	1.01761
	12	PC12	PC95	19	18	1.3553	1.00683
	13	PC6	-	14	-	1.3477	1.00119
	14	PC12	-	19	-	1.3371	0.993314
	15	PC2	-	39	-	1.331	0.988782
	16	PC7	-	17	-	1.3198	0.980462
	17	PC19	PC40	0	0	1.3817	1.02645
	18	PC19	PC41	0	19	1.3781	1.02377
	19	PC26	PC63	0	14	1.331	0.988782
	20	PC19	PC69	0	17	1.3856	1.02934
	21	PC19	PC70	0	24	1.381	1.02593
	22	PC26	PC69	0	17	1.3122	0.974816
	23	PC22	PC72	16	23	1.2831	0.953198
	24	PC22	PC69	16	17	1.2288	0.912859
	25	PC19	PC83	0	14	1.3836	1.02786
	26	PC19	PC95	0	18	1.3786	1.02414
	27	PC19	-	0	-	1.3308	0.988634
	28	PC22	-	16	-	1.2795	0.950524
	29	PC26	-	0	-	1.2586	0.934997
	30	PC41	PC49	19	14	1.3875	1.03076
	31	PC44	PC49	0	14	1.3835	1.02778
	32	PC44	PC63	0	14	1.3454	0.99948
	33	PC40	PC69	0	17	1.3538	1.00572
	34	PC44	PC69	0	17	1.3497	1.00267
	35	PC44	PC76	0	0	1.3762	1.02236
	36	PC40	PC83	0	14	1.4027	1.04205
	37	PC41	PC83	19	14	1.3811	1.026
	38	PC40	-	0	-	1.3291	0.987371
	39	PC44	-	0	-	1.3237	0.983359
	40	PC41	-	19	-	1.31	0.973182
	41	PC49	PC70	14	24	1.3851	1.02897
	42	PC49	PC67	14	17	1.384	1.02816
	43	PC49	PC83	14	14	1.3682	1.01642
	44	PC49	PC95	14	18	1.3547	1.00639
	45	PC60	PC83	0	14	1.3534	1.00542
	46	PC60	PC95	0	18	1.3392	0.994874
	47	PC60	-	0	-	1.32	0.980611
	48	PC49	-	14	-	1.3164	0.977936
	49	PC63	PC70	14	24	1.3814	1.02622
	50	PC63	PC69	14	17	1.3603	1.01055
	51	PC63	PC95	14	18	1.3577	1.00862
	52	PC63	-	14	-	1.3205	0.980982
	53	PC67	PC76	17	0	1.3564	1.00765
	54	PC70	PC83	24	14	1.3887	1.03165
	55	PC69	PC95	17	18	1.3886	1.03157
	56	PC72	PC83	23	14	1.3881	1.0312
	57	PC72	-	23	-	1.3359	0.992423
	58	PC67	-	17	-	1.3327	0.990045
	59	PC70	-	24	-	1.3268	0.985662
	60	PC69	-	17	-	1.3156	0.977342
	61	PC76	PC95	0	18	1.3522	1.00453
	62	PC76	-	0	-	1.3392	0.994874
	63	PC83	-	14	-	1.3371	0.993314
	64	PC95	-	18	-	1.3306	0.988485
