# Supplementary material for: Fusion of genomic, proteomic and phenotypic data: the case of potyviruses
Source: Royal Society of Chemistry journal article supplement (doi:10.1039/c5mb00507h), 2015-11-04
Supplement: c5mb00507h2.pdf [file c5mb00507h2.pdf]

**PLS regression results (complete model).**

|                      | <b>R<sup>2</sup>X cum.</b> | <b>R<sup>2</sup>y cum.</b> | <b>Q<sup>2</sup> cum.</b> |
|----------------------|----------------------------|----------------------------|---------------------------|
| <b>1st component</b> | 10.4%                      | 56.3%                      | 31.1%                     |
| <b>2nd component</b> | 25.6%                      | 66.7%                      | 45.6%                     |
| <b>3rd component</b> | 33.5%                      | 76.3%                      | 47.3%                     |
