# Supplementary figures and images for: Fusion of genomic, proteomic and phenotypic data: the case of potyviruses
Source: Royal Society of Chemistry journal article supplement (doi:10.1039/c5mb00507h), 2015-11-04

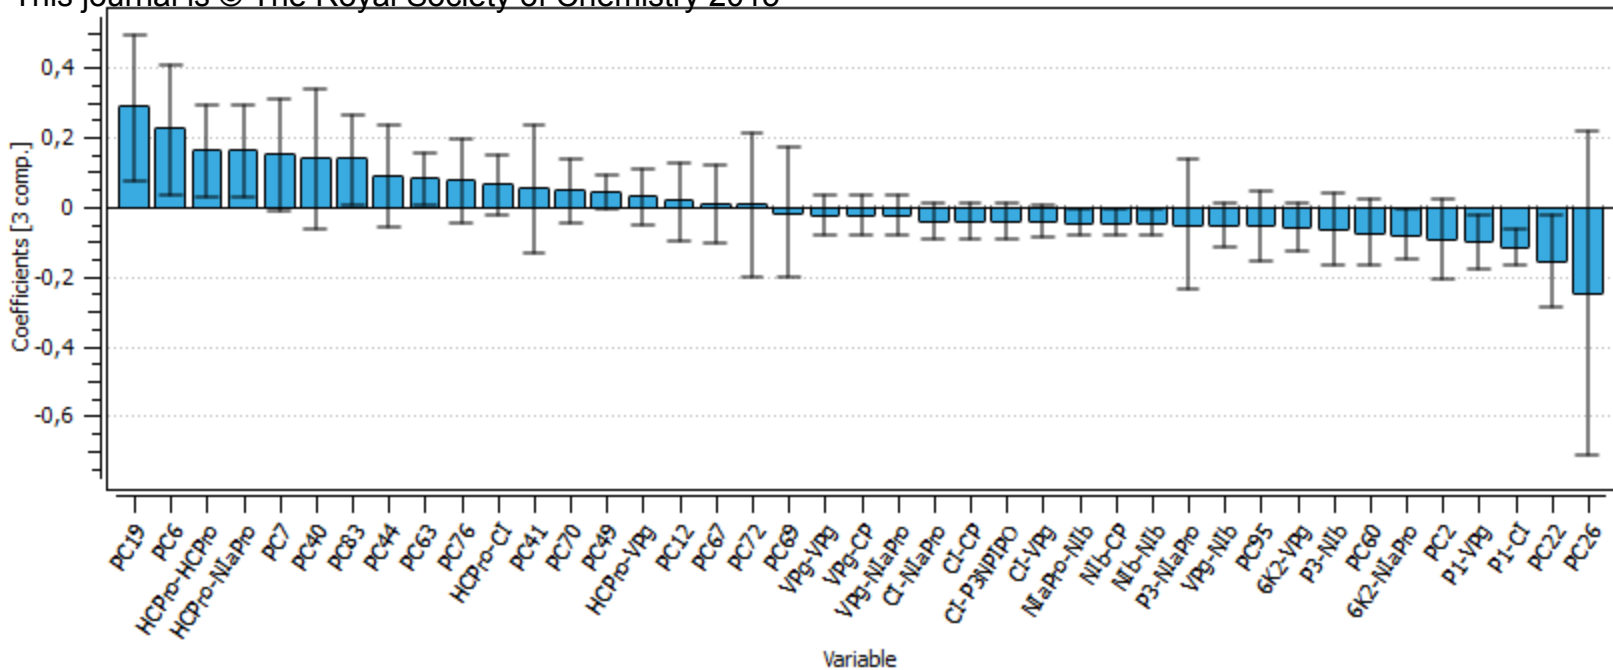

Supplement: c5mb00507h3.pdf [file c5mb00507h3.pdf]
